# Supplementary material
Source: publisher figshare collection journal article supplement (https://karger.figshare.com/ndownloader/files/17796518)

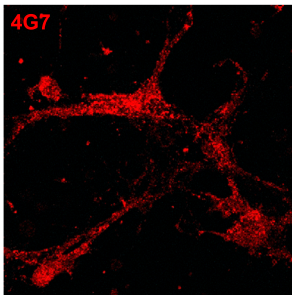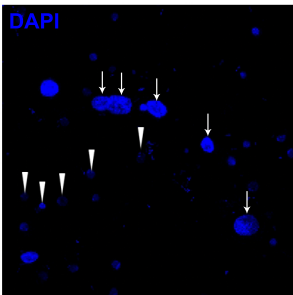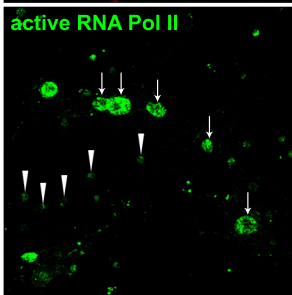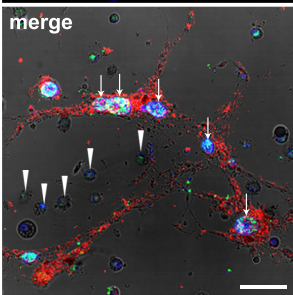

**Figure S3**

Supplement: Supplementary file 1 [file 17796518]
